# Supplementary material
Source: ML conference proceedings conference paper supplement (https://openaccess.thecvf.com/content/ICCV2023/html/Esser_Structure_and_Content-Guided_ICCV_2023_paper.html)
Supplement: Supplementary file 1 [file Esser_Structure_and_Content-Guided_ICCV_2023_supplemental.zip]

# Supplementary Material for Structure and Content-Guided Video Synthesis with Diffusion Models

Patrick Esser

Johnathan Chiu

Parmida Atighehchian

Jonathan Granskog

Anastasis Germanidis

Runway

<https://research.runwayml.com/gen1>

**Training time and cost** After initialization from the pre-trained image weights, our model was trained for an additional 125k steps taking approximately 32,640 GPU hours on A100. This corresponds to roughly 20% of the compute costs for the image pretraining, showing the benefits of re-using weights. See section 3 of the main paper for details about the different stages of training.

**Training data creation** As described in section 3, we train on a mixed dataset consisting of both images and videos. Our video dataset was created from a set of videos that have an aspect ratio within 10% of 16 : 9 and a smaller side larger than 700 pixels. We split the videos into clips by detecting cuts using both content-aware and threshold-based detection as implemented in PySceneDetect. We further split long clips until each of them is less than 20 seconds long and discard clips that have less than 18 frames. For our internal collection of videos, this process resulted in 6.4M clips that we use for training. For training, we additionally crop and downsample the videos to a lower resolution.

**Evaluation data creation** For evaluation, we test on stock footage and videos from DAVIS [4]. We create edited captions to test with by first producing an initial caption of the input video with BLIP [2] and then asking GPT-3 [1] to create edit prompts and matching captions given the initial caption. The initial caption is generated from the first frame of the video. The edited caption is achieved by requesting GPT-3 to modify the original caption such that it describes an edited version of the video instead of the original video. For example, if the BLIP-predicted caption is *there is a bear that is walking through the forest* then GPT-3 might suggest an edit such as *edit it so that the bear is in space* and a final caption such as *a space bear walking through the stars*. See Tab. 3 for a few examples of captions, edit prompts and the edited captions for some videos from the DAVIS dataset.

The full input prompt to GPT-3 to produce edit prompts

and modified captions was:

You are the most creative VFX artist in the world, extremely skilled at coming up with original ideas for editing videos. You are tasked with coming up with triplets of "caption, edit, modified caption" for possible video editing tasks. Cover a wide variety of creative edits, including editing the content, background, or style of the video. Try to be creative and come up with edits that are not obvious. For example, avoid changing the color of objects.

Examples:

- a man looking at the camera, in the the style of pin-screen animation, pinscreen animation of a man looking at the camera
- kite-surfer in the ocean, same scene during sunset, kite-surfer in the ocean at sunset,
- car on a road in the countryside, make the car cyberpunk, cyberpunk neon car on a road in the countryside

New Edit:

{ BLIP caption },

where { BLIP caption } represents the initial caption predicted for the first frame of the video.

**Parameterization** In early experiments on moving MNIST, we observed fewer color artifacts with a  $v$ -parameterization compared to an  $\epsilon$ -parameterization. Thus, we conducted all further experiments with  $v$ -parameterizations. Further investigation points to a problem with the diffusion schedule, where the terminal signal-noise ratio (SNR) of the diffusion process remains too large [3]. The  $\epsilon$ -parameterization weighs the loss by the SNR [5], giving less importance to steps with a low SNR. In contrast, the  $v$ -parameterization results in a "SNR+1" weighting, giving higher weights at low SNR steps and counteracting issues caused by schedules with non-zero terminal SNR.

| method      | frame consistency   | prompt consistency  | w/ depth preferred |
|-------------|---------------------|---------------------|--------------------|
| w/ depth    | 0.9648 $\pm$ 0.0031 | 0.2805 $\pm$ 0.0065 | —                  |
| w/ hed      | 0.9813 $\pm$ 0.0031 | 0.2652 $\pm$ 0.0072 | 68.57%             |
| w/o struct. | 0.9482 $\pm$ 0.0034 | 0.2769 $\pm$ 0.0062 | 64.71%             |
| w/o temp.   | 0.9396 $\pm$ 0.0035 | 0.2838 $\pm$ 0.0060 | 57.14%             |

Table 1. Ablations on structure conditioning and temporal UNet.

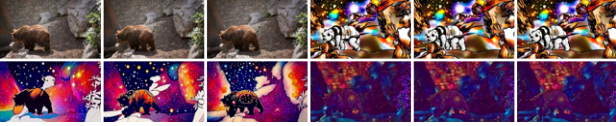

Figure 1. Top-left to bottom-right: Three frames of input, w/ depth, w/o temp and w/ hed for “a space bear walking through the stars”.

**Format of structure representation** We also compare our depth-conditioned model against a model receiving edge maps extracted with holistically-nested edge detection (HED) [6] as input instead of depth maps. We denote this model *w/ hed* in Tab. 1. We observe a significantly lower prompt consistency ( $\times 2.23\sigma$ ) for the edge-conditioned model. This suggests that edge maps mix content and structure more strongly than depth maps. We show a qualitative example of this in Fig. 1, where the edge map reveals the background to be a wall and the edge-conditioned model fails to edit the background to stars. However, the frame consistency of this model is higher, suggesting that increased structure information can improve temporal stability. Still, through a user study, we show that depth-conditioning is preferred (68.57%), demonstrating a better trade-off between frame- and prompt consistency. We note that the optimal structure representation will depend on the application.

Additionally, a model not provided a representation of structure (*w/o struct*) achieves lower frame consistency and slightly worse prompt consistency. Users also report higher preference for our model that receives depth maps.

**Temporal connections** In Tab. 1, we also show metrics for a model trained without temporal connections (*i.e.* only spatial convolutions and attention), which is labeled with *w/o temp*. It achieves similar prompt consistency to our spatio-temporal model but much lower frame consistency. Users also show a slight preference for our model with additional processing along the time axis. Note also that temporal connections have a larger impact on the temporal consistency compared to providing a structure representation. However, this is likely partly due to our structure representation being predicted independently for each frame. A depth map predictor built for video input could increase temporal stability.

**Raw data and additional comparisons** We include the raw data of Fig. 6 and Fig. 7 in Tab. 2. Fig. 2-8 contain additional results for text based edits, Fig. 9-13 for image based edits. Fig. 14 shows a qualitative comparison.

## References

- [1] Tom Brown, Benjamin Mann, Nick Ryder, Melanie Subbiah, Jared D Kaplan, Prafulla Dhariwal, Arvind Neelakantan, Pranav Shyam, Girish Sastry, Amanda Askell, Sandhini Agarwal, Ariel Herbert-Voss, Gretchen Krueger, Tom Henighan, Rewon Child, Aditya Ramesh, Daniel Ziegler, Jeffrey Wu, Clemens Winter, Chris Hesse, Mark Chen, Eric Sigler, Mateusz Litwin, Scott Gray, Benjamin Chess, Jack Clark, Christopher Berner, Sam McCandlish, Alec Radford, Ilya Sutskever, and Dario Amodei. Language models are few-shot learners. In H. Larochelle, M. Ranzato, R. Hadsell, M.F. Balcan, and H. Lin, editors, *Advances in Neural Information Processing Systems*, volume 33, pages 1877–1901. Curran Associates, Inc., 2020. 1, 17
- [2] Junnan Li, Dongxu Li, Caiming Xiong, and Steven Hoi. Blip: Bootstrapping language-image pre-training for unified vision-language understanding and generation. In *ICML*, 2022. 1, 17
- [3] Shanchuan Lin, Bingchen Liu, Jiashi Li, and Xiao Yang. Common diffusion noise schedules and sample steps are flawed, 2023. 1
- [4] Jordi Pont-Tuset, Federico Perazzi, Sergi Caelles, Pablo Arbeláez, Alexander Sorkine-Hornung, and Luc Van Gool. The 2017 davis challenge on video object segmentation. *arXiv:1704.00675*, 2017. 1, 17
- [5] Robin San-Roman, Eliya Nachmani, and Lior Wolf. Noise estimation for generative diffusion models. *arXiv preprint arXiv:2104.02600*, 2021. 1
- [6] Saining Xie and Zhuowen Tu. Holistically-nested edge detection. In *Proceedings of the IEEE international conference on computer vision*, pages 1395–1403, 2015. 2



| Prompt                                                                 | Driving Video (top) and Result (bottom)                                             |                                                                                     |                                                                                      |                                                                                       |                                                                                       |                                                                                     |                                                                                     |                                                                                      |                                                                                       |                                                                                       |
|------------------------------------------------------------------------|-------------------------------------------------------------------------------------|-------------------------------------------------------------------------------------|--------------------------------------------------------------------------------------|---------------------------------------------------------------------------------------|---------------------------------------------------------------------------------------|-------------------------------------------------------------------------------------|-------------------------------------------------------------------------------------|--------------------------------------------------------------------------------------|---------------------------------------------------------------------------------------|---------------------------------------------------------------------------------------|
| pencil sketch of a man looking at the camera, black and white          |    |    |    |    |    |    |    |    |    |    |
| a man using a laptop inside a train, anime style                       |    |    |    |    |    |    |    |    |    |    |
| a woman and man take selfies while walking down the street, claymation |   |   |   |   |   |  |  |  |  |  |
| oil painting of a man driving                                          |  |  |  |  |  |  |  |  |  |  |
| low-poly render of a man texting on the street                         |  |  |  |  |  |  |  |  |  |  |

Figure 2. Additional results for text-to-video-editing.



| Prompt                                                                         | Driving Video (top) and Result (bottom)                                              |  |  |  |  |  |  |  |  |  |
|--------------------------------------------------------------------------------|--------------------------------------------------------------------------------------|--|--|--|--|--|--|--|--|--|
| 2D vector animation of a group of flamingos standing near some rocks and water |    |  |  |  |  |  |  |  |  |  |
| cartoon animation of an elephant walks through dirt surrounded by boulders     |    |  |  |  |  |  |  |  |  |  |
| cyberpunk neon car on a road in the countryside                                |   |  |  |  |  |  |  |  |  |  |
| a crochet black swan swims in a pond with rocks and vegetation                 |  |  |  |  |  |  |  |  |  |  |
| a dalmatian dog is walking away from a fence                                   |  |  |  |  |  |  |  |  |  |  |

Figure 3. Additional results for text-to-video-editing.



| Prompt                                                          | Driving Video (top) and Result (bottom)                                             |                                                                                     |                                                                                      |                                                                                       |                                                                                       |                                                                                     |                                                                                     |                                                                                      |                                                                                       |                                                                                       |
|-----------------------------------------------------------------|-------------------------------------------------------------------------------------|-------------------------------------------------------------------------------------|--------------------------------------------------------------------------------------|---------------------------------------------------------------------------------------|---------------------------------------------------------------------------------------|-------------------------------------------------------------------------------------|-------------------------------------------------------------------------------------|--------------------------------------------------------------------------------------|---------------------------------------------------------------------------------------|---------------------------------------------------------------------------------------|
| kite-surfer in the ocean at sunset                              |    |    |    |    |    |    |    |    |    |    |
| car on a snow-covered road in the countryside                   |   |   |   |   |   |  |  |  |  |  |
| small grey suv driving in front of apartment buildings at night |  |  |  |  |  |  |  |  |  |  |
| a space bear walking through the stars                          |  |  |  |  |  |  |  |  |  |  |
| white swan swimming in the water                                |  |  |  |  |  |  |  |  |  |  |

Figure 4. Additional results for text-to-video-editing.



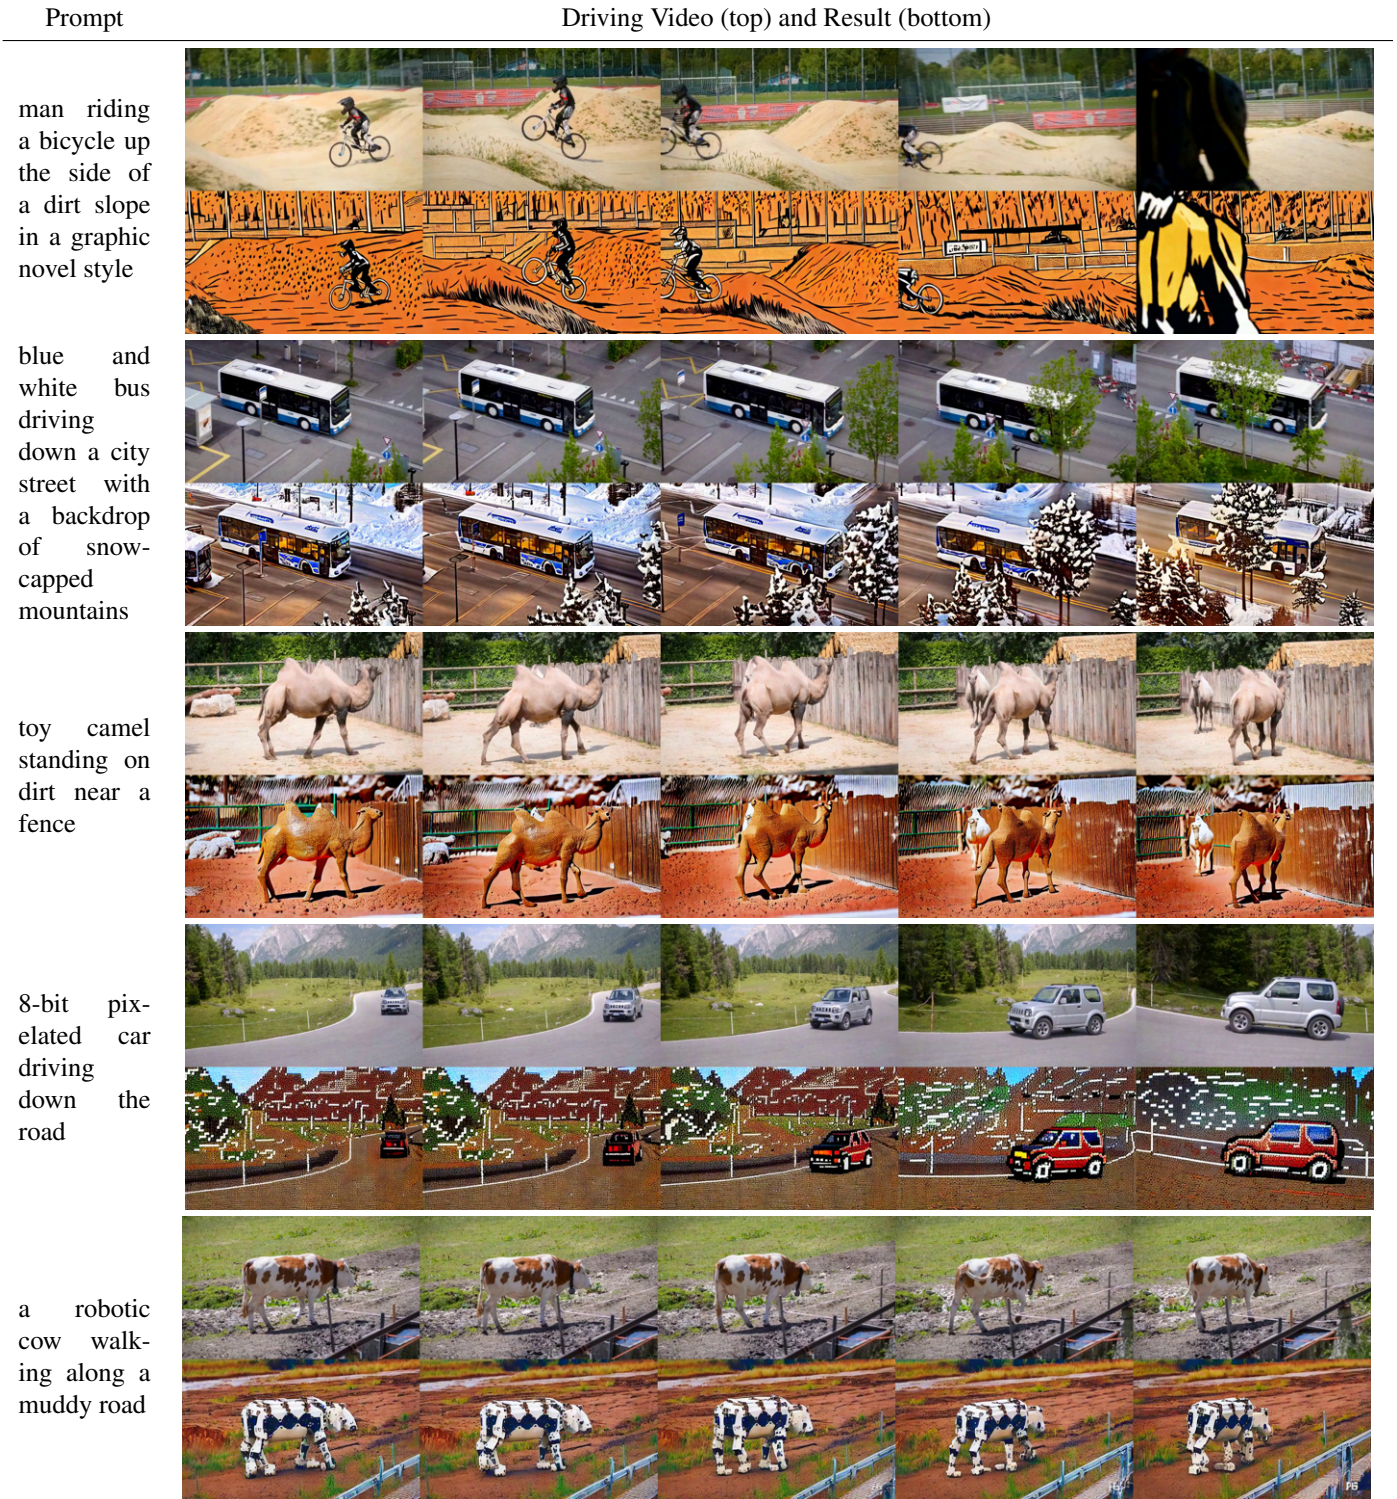

Figure 5. Additional results for text-to-video-editing.



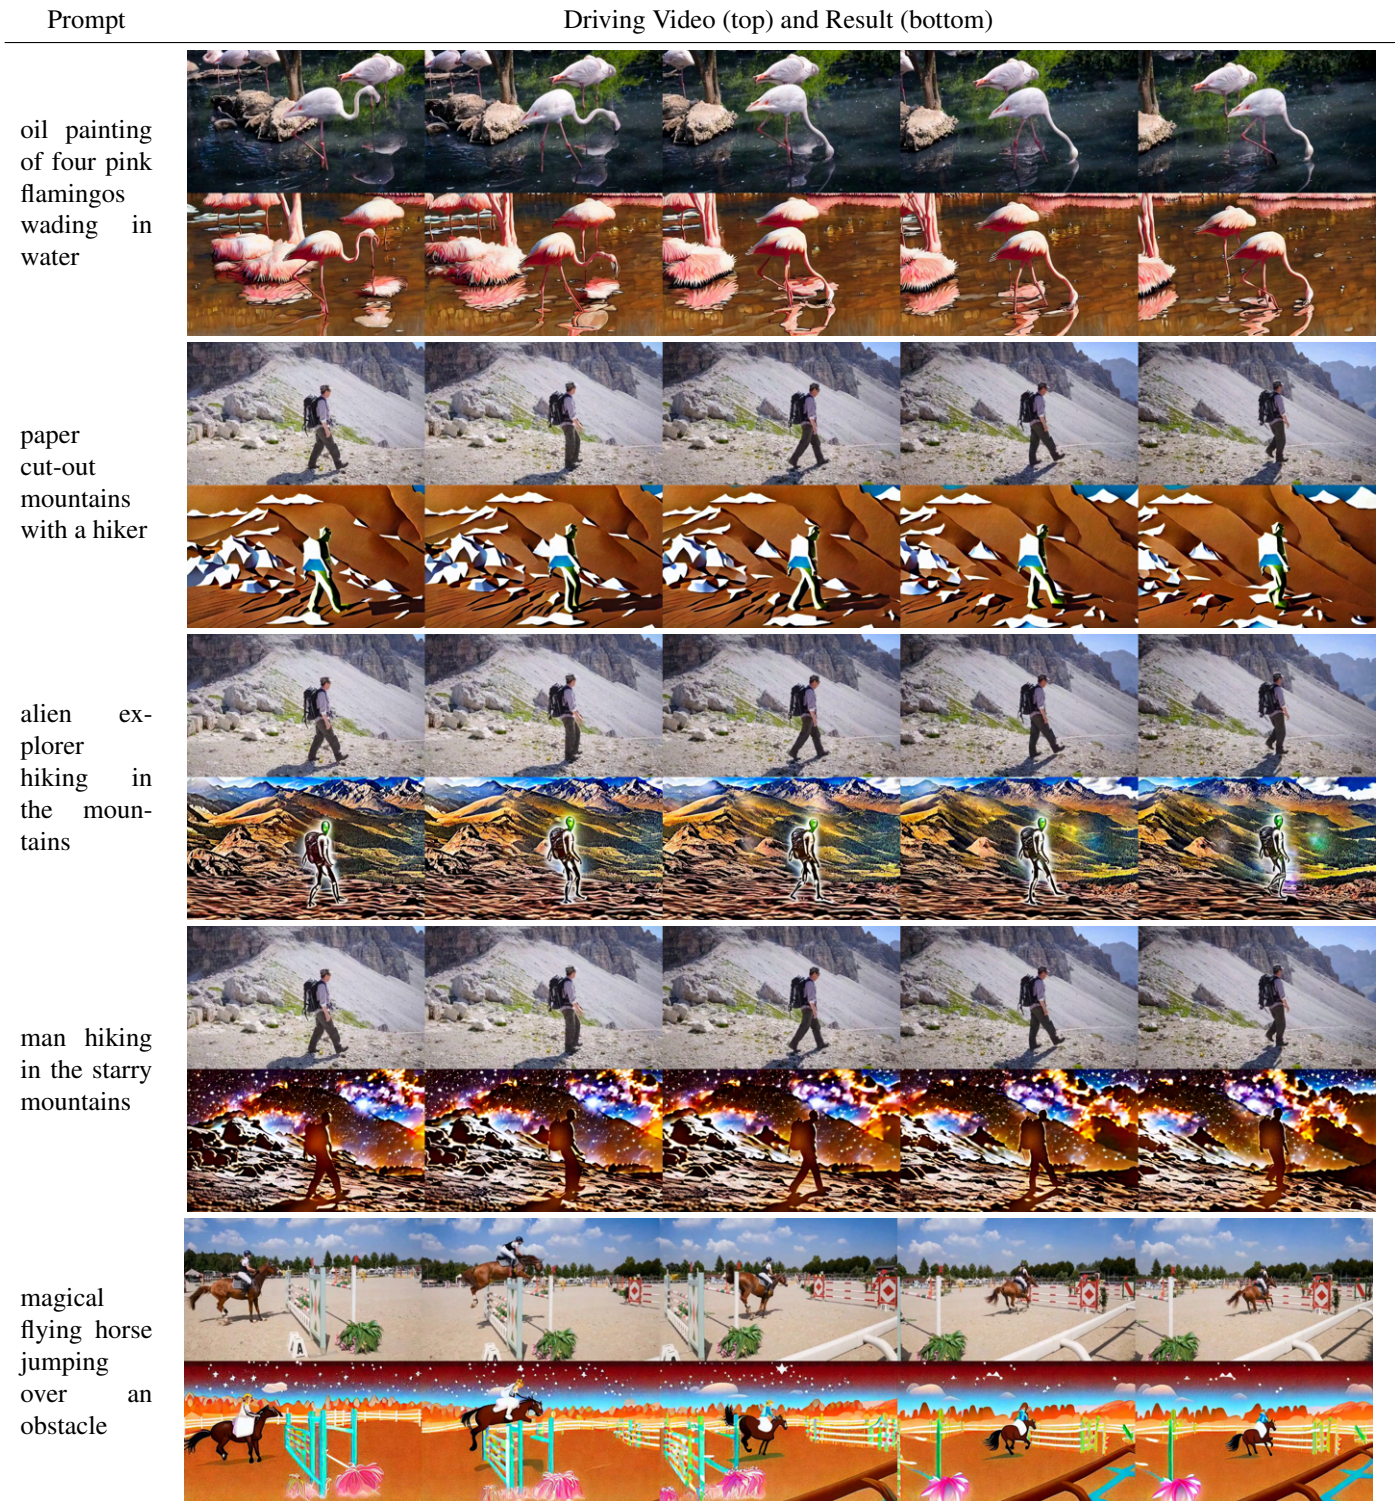

Figure 6. Additional results for text-to-video-editing.



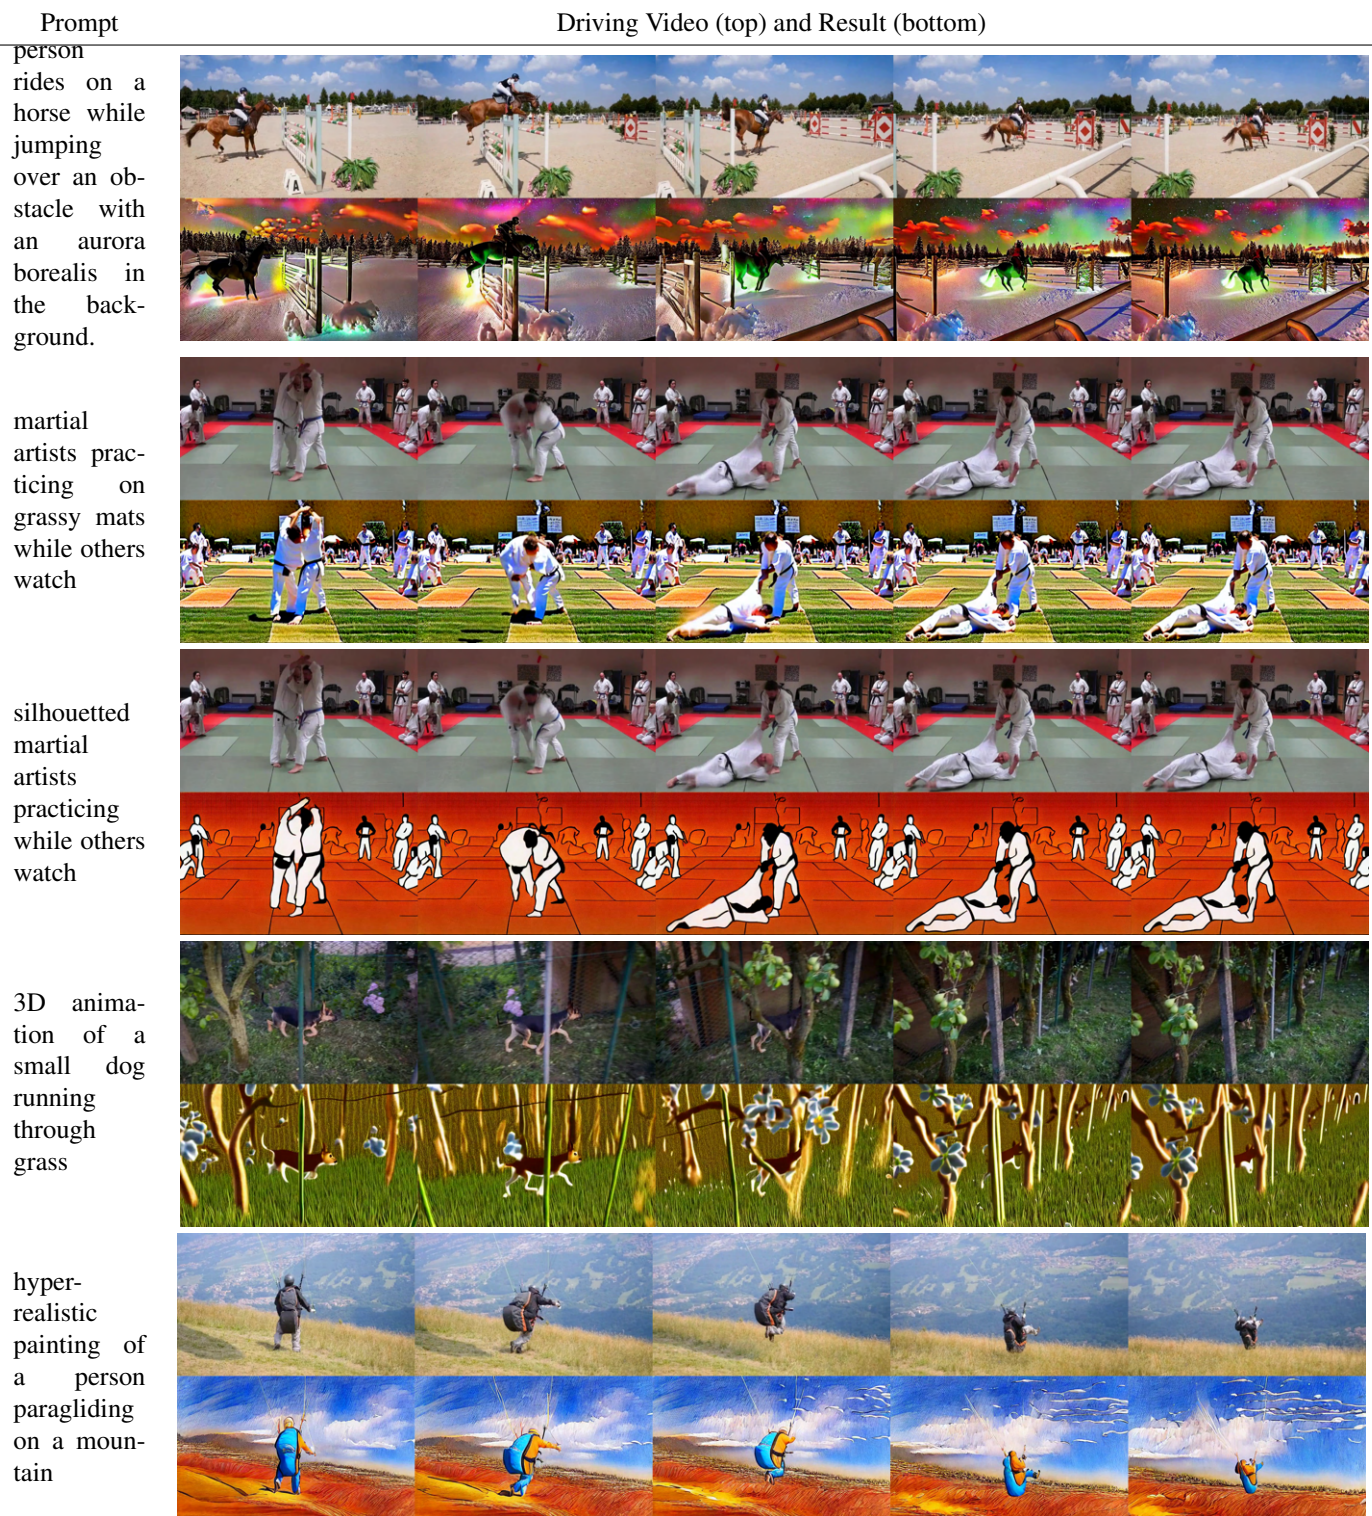

Figure 7. Additional results for text-to-video-editing.



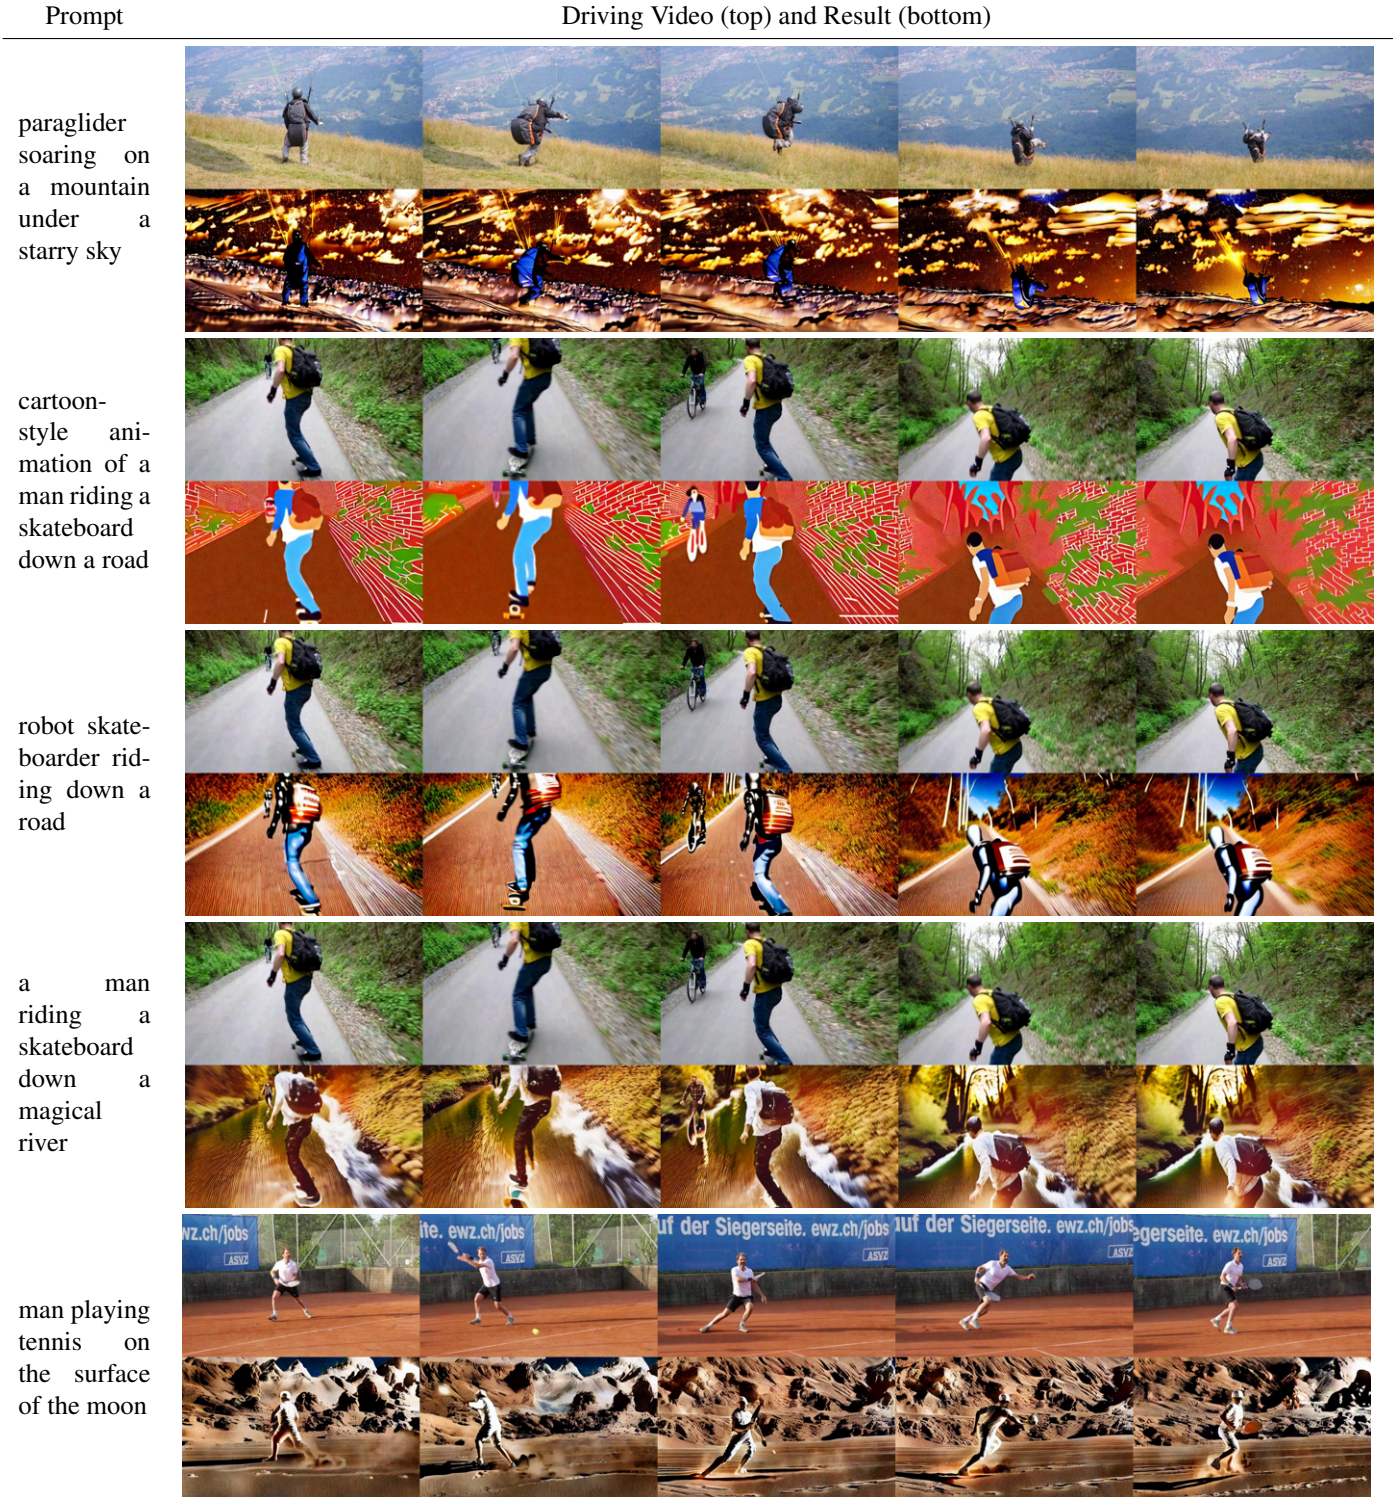

Figure 8. Additional results for text-to-video-editing.



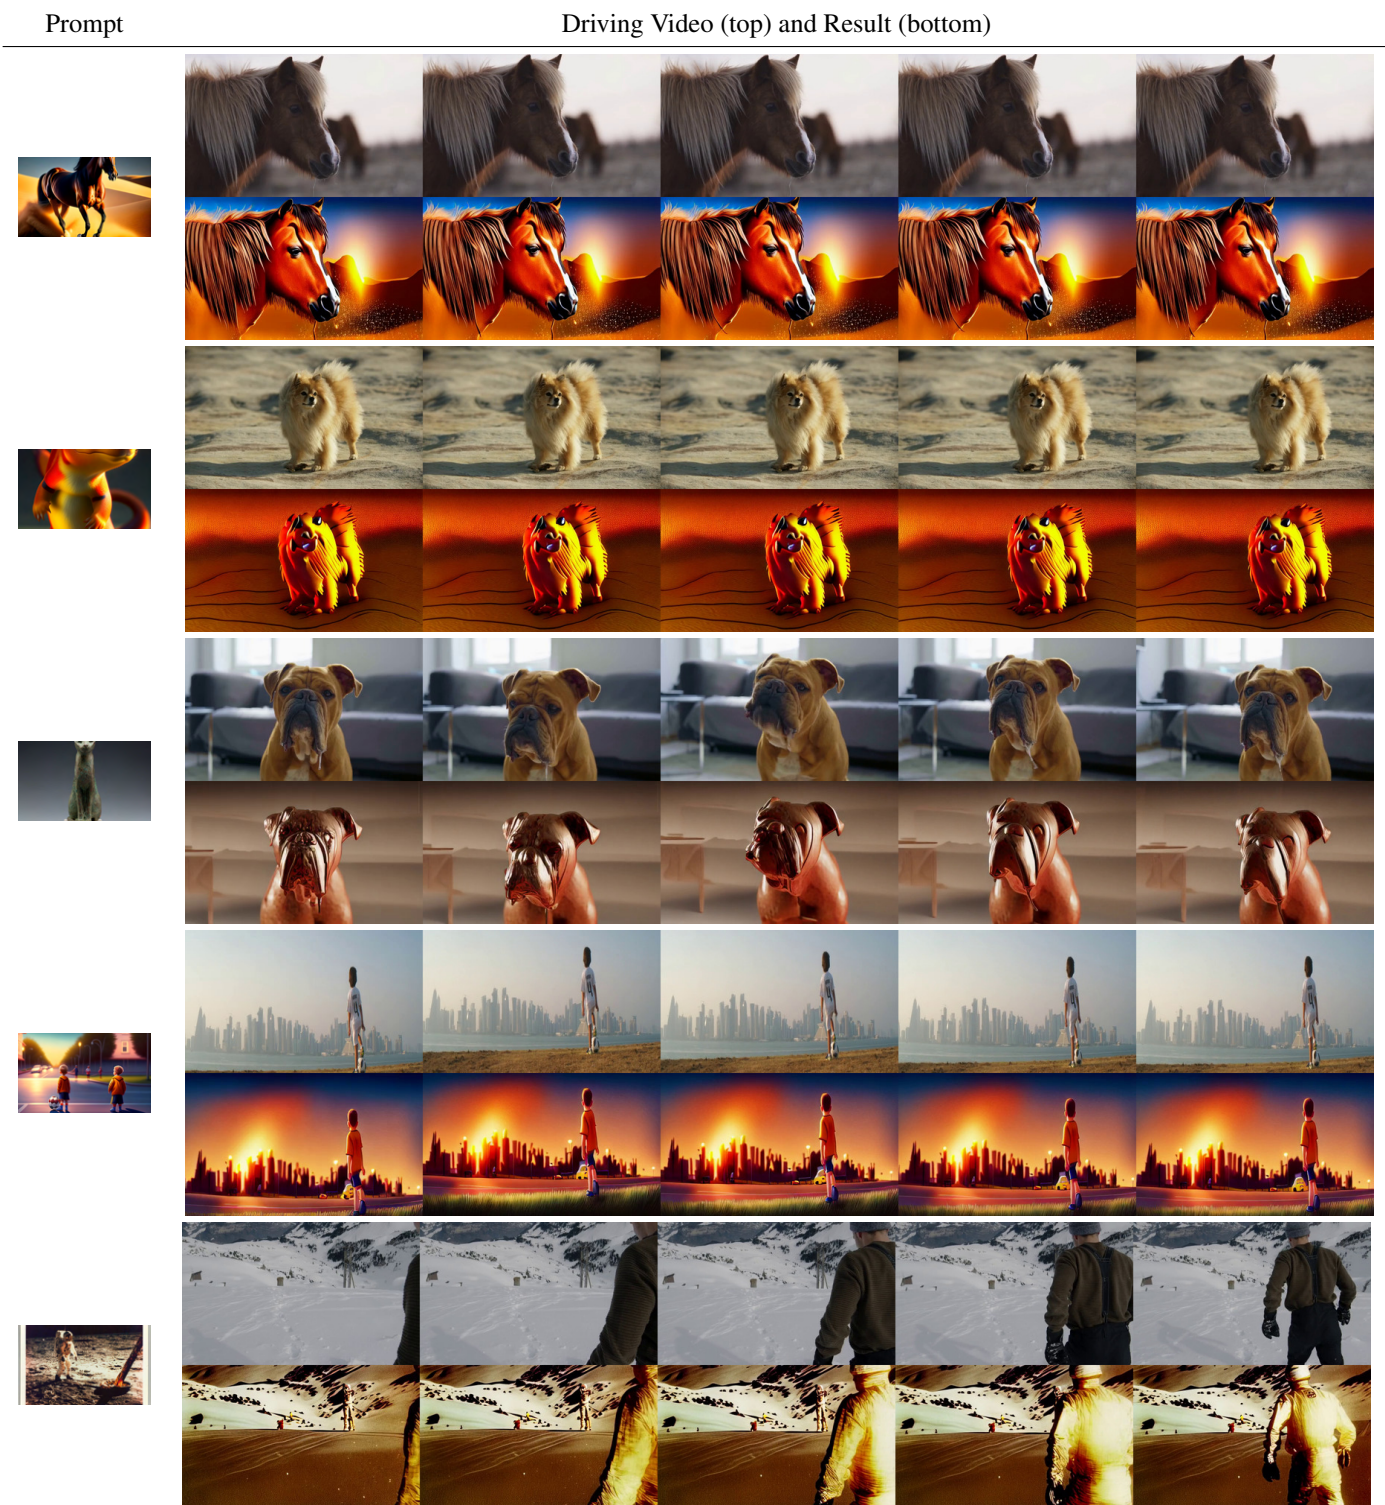

Figure 9. Additional results for image-to-video-editing.



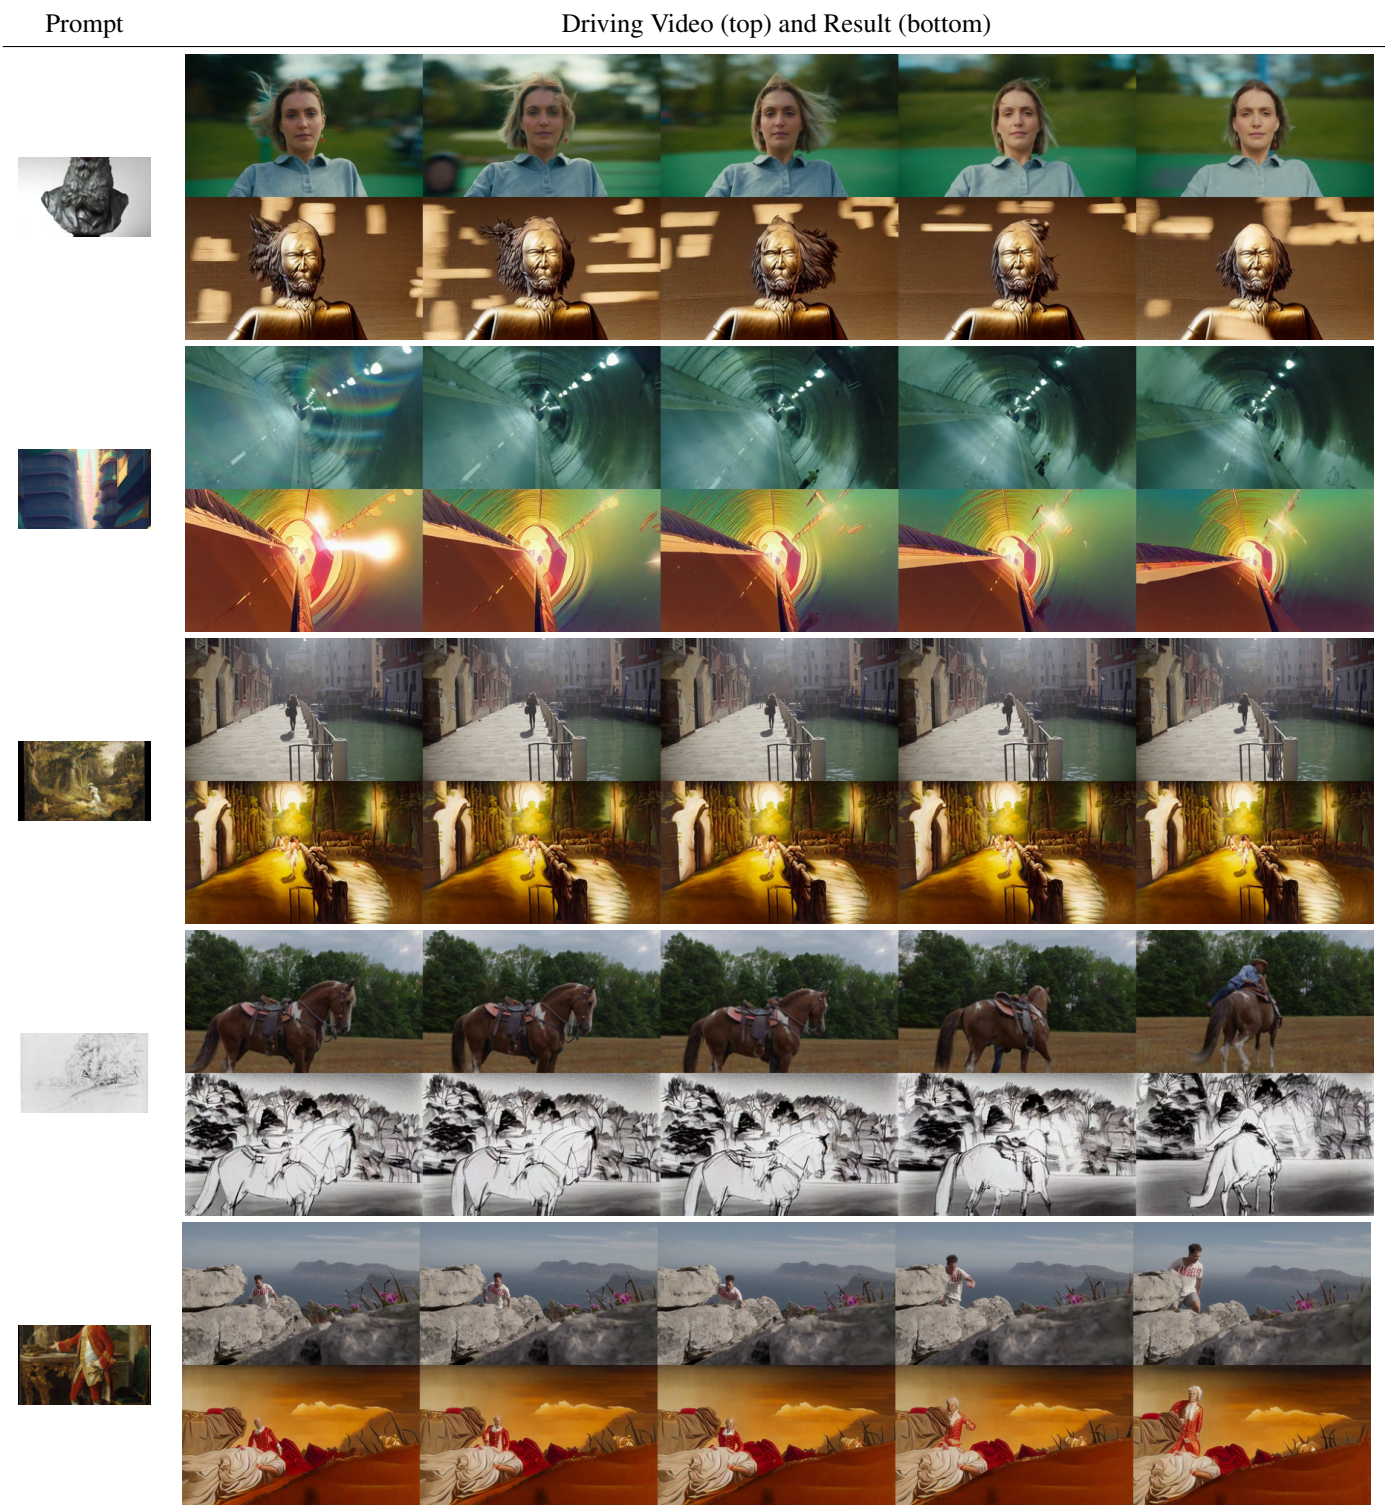

Figure 10. Additional results for image-to-video-editing.



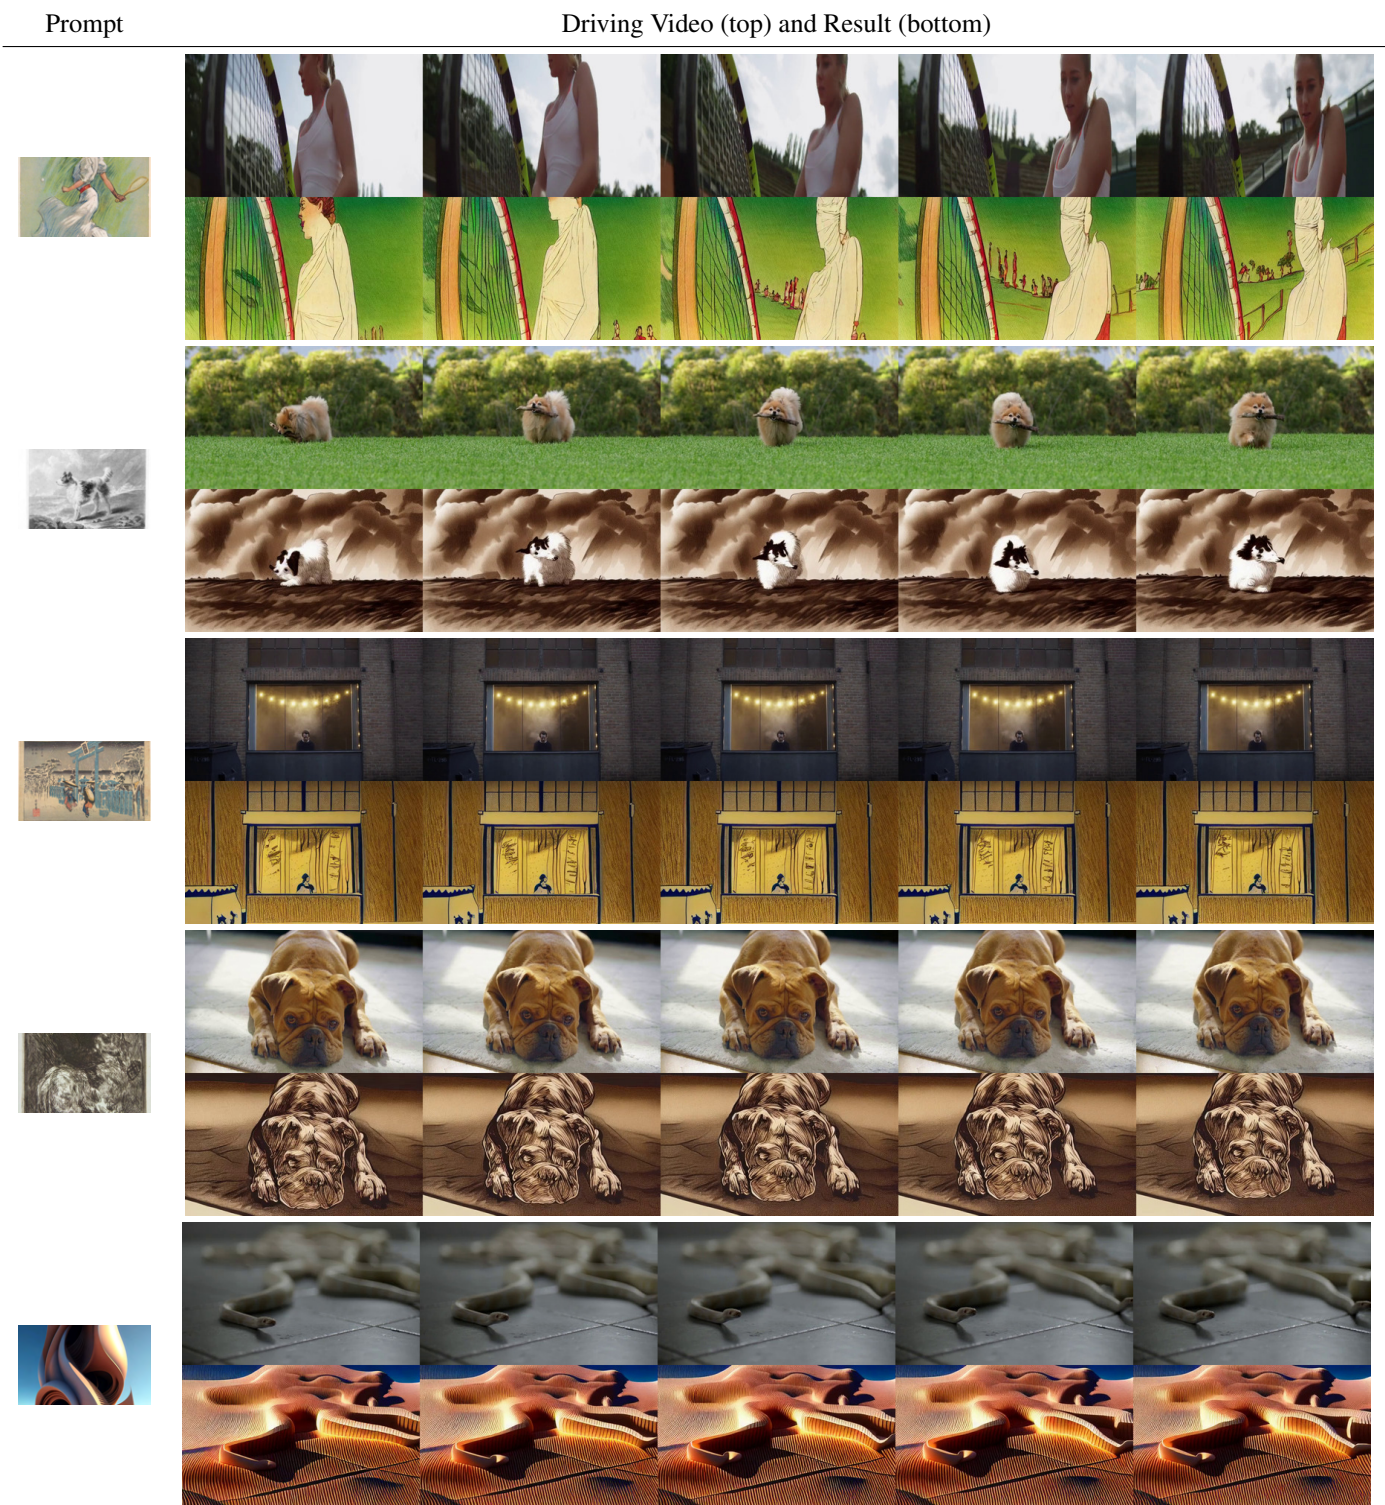

Figure 11. Additional results for image-to-video-editing.



Prompt

Driving Video (top) and Result (bottom)

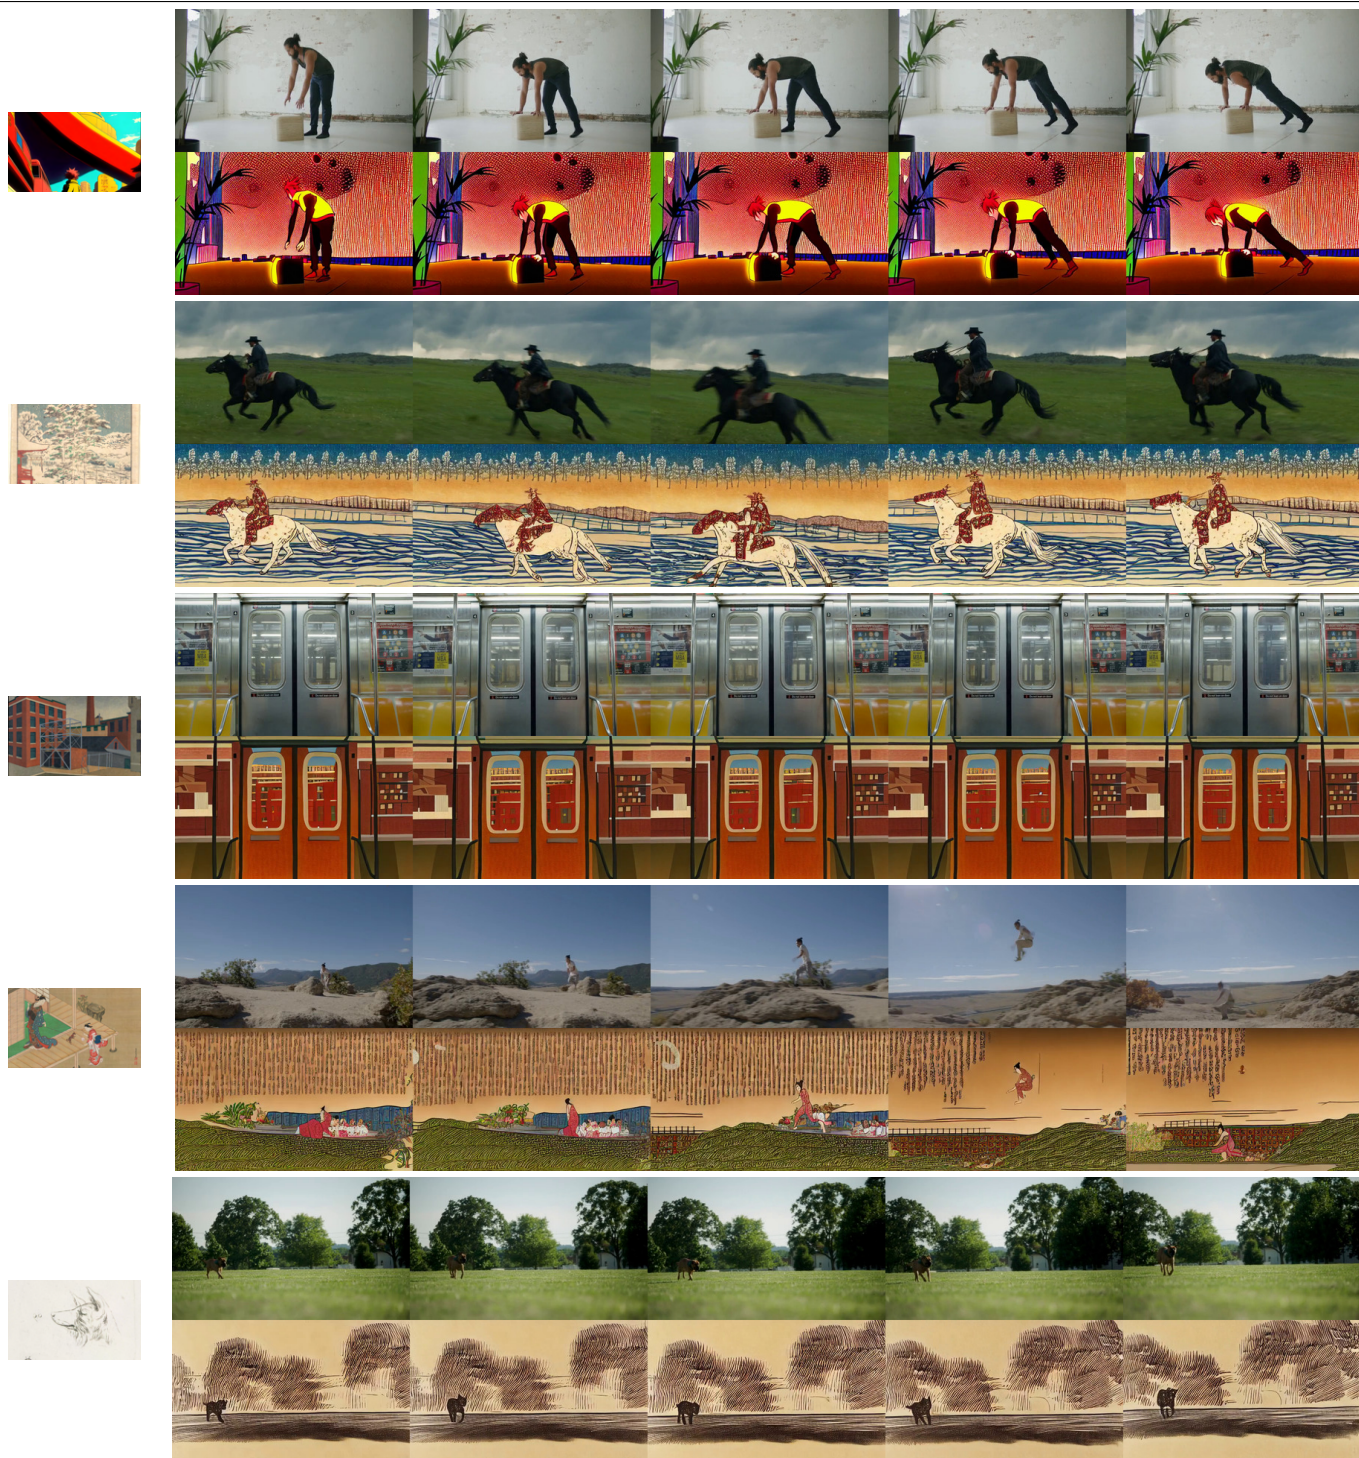

Figure 12. Additional results for image-to-video-editing.



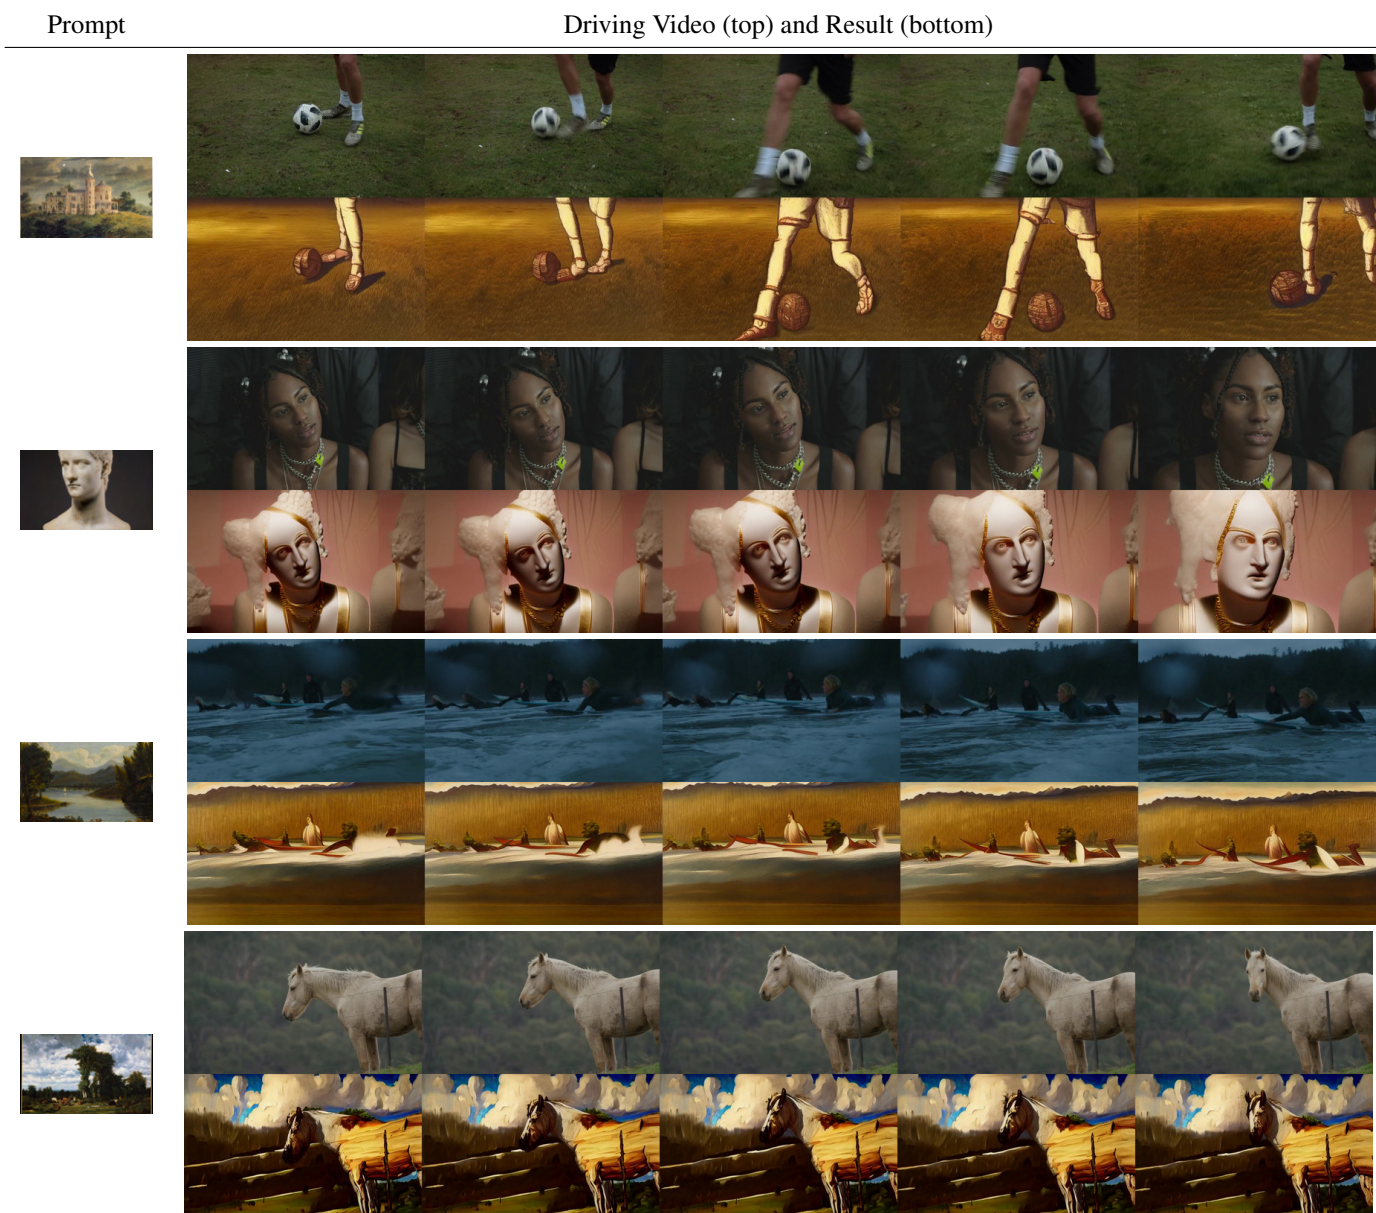

Figure 13. Additional results for image-to-video-editing.



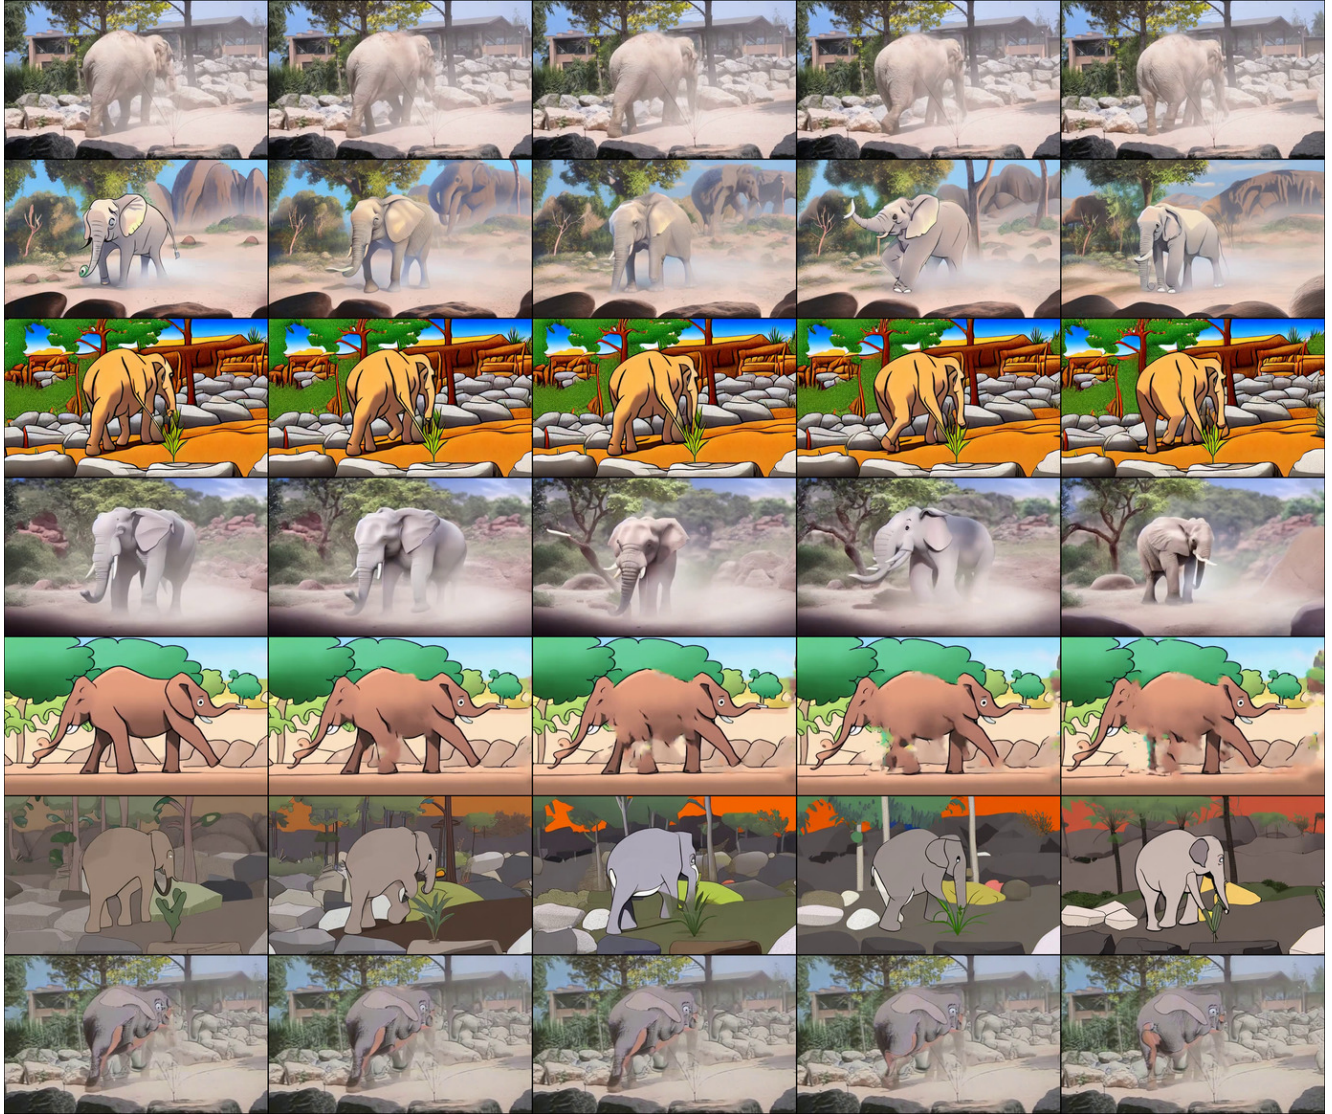

Figure 14. Visual comparison between evaluated methods. From top to bottom: input, Deform, ours, SDEdit, IVS, Depth-SD, Text2Live.



| method                                          | frame<br>consistency | prompt<br>consistency | ours<br>preferred |
|-------------------------------------------------|----------------------|-----------------------|-------------------|
| Deforum                                         | 0.9087 $\pm 0.0079$  | 0.2693 $\pm 0.0075$   | 77.14%            |
| SDEdit, strength=50%                            | 0.9277 $\pm 0.0062$  | 0.2454 $\pm 0.0073$   | 85.29%            |
| SDEdit, strength=75%                            | 0.9189 $\pm 0.0078$  | 0.2754 $\pm 0.0073$   | 73.53%            |
| IVS, strength=50%                               | 0.9673 $\pm 0.0035$  | 0.2401 $\pm 0.0076$   | 79.41%            |
| IVS, strength=75%                               | 0.9668 $\pm 0.0030$  | 0.2556 $\pm 0.0074$   | 91.18%            |
| Depth-SD                                        | 0.9126 $\pm 0.0064$  | 0.2871 $\pm 0.0070$   | 74.29%            |
| Text2LIVE                                       | 0.9683 $\pm 0.0025$  | 0.2732 $\pm 0.0078$   | 88.24%            |
| ours, $\sim s$ , strength=50%                   | 0.9541 $\pm 0.0039$  | 0.2703 $\pm 0.0074$   | 67.65%            |
| ours, $\sim s$ , strength=75%                   | 0.9482 $\pm 0.0034$  | 0.2769 $\pm 0.0062$   | 64.71%            |
| ours, $t_s = 0, \omega_t = 1.00, \omega = 7.50$ | 0.9648 $\pm 0.0031$  | 0.2805 $\pm 0.0065$   | -                 |
| ours, $t_s = 0, \omega_t = 0.50, \omega = 7.50$ | 0.9238 $\pm 0.0039$  | 0.2820 $\pm 0.0057$   | -                 |
| ours, $t_s = 0, \omega_t = 0.75, \omega = 7.50$ | 0.9521 $\pm 0.0030$  | 0.2822 $\pm 0.0063$   | -                 |
| ours, $t_s = 0, \omega_t = 1.25, \omega = 7.50$ | 0.9702 $\pm 0.0026$  | 0.2793 $\pm 0.0060$   | -                 |
| ours, $t_s = 0, \omega_t = 1.50, \omega = 7.50$ | 0.9722 $\pm 0.0024$  | 0.2754 $\pm 0.0058$   | -                 |
| ours, $t_s = 4, \omega_t = 1.00, \omega = 7.50$ | 0.9678 $\pm 0.0025$  | 0.2866 $\pm 0.0065$   | -                 |
| ours, $t_s = 6, \omega_t = 1.00, \omega = 7.50$ | 0.9717 $\pm 0.0023$  | 0.2854 $\pm 0.0065$   | -                 |
| ours, $t_s = 7, \omega_t = 1.00, \omega = 7.50$ | 0.9790 $\pm 0.0025$  | 0.2766 $\pm 0.0062$   | -                 |

Table 2. Quantitative evaluations corresponding to Fig. 6 and Fig. 7.  $\pm$  denotes standard error obtained with a sample size of 35.



| BLIP caption                                                          | edit prompt from GPT-3                                                 | edited caption from GPT-3                                                           |
|-----------------------------------------------------------------------|------------------------------------------------------------------------|-------------------------------------------------------------------------------------|
| there is a bear that is walking through the forest                    | make the bear seem like an illusion                                    | the illusion of a bear walking through the forest                                   |
| there is a black swan that is swimming in the water                   | morph the swan into a white swan                                       | white swan swimming in the water                                                    |
| a man riding a bicycle up the side of a dirt slope                    | turn the man into a cartoon character                                  | cartoon character riding a bicycle up the side of a dirt slope                      |
| a man doing a handstand on the pavement in front of a building        | turn the man into a robot                                              | robot doing a handstand on the pavement in front of a building                      |
| a blue and white bus driving down a city street                       | transform the bus into a colorful graffiti art piece                   | graffiti art piece bus driving down a city street                                   |
| a camel is standing on dirt near a fence                              | turn the scene into a desert oasis                                     | oasis in the desert with a camel near a fence                                       |
| car with the passenger seat up on the road                            | replace car with a hot air balloon                                     | hot air balloon with the passenger seat up on the road                              |
| there is a car that is driving down the road                          | make the car into a submarine                                          | submarine driving down the road                                                     |
| the cow is walking along the muddy road                               | turn the cow into a robot                                              | a robotic cow walking along a muddy road                                            |
| four pink flamingos wading in water in a zoo                          | make the flamingos look like they are flying in the sky                | four flamingos flying in the sky                                                    |
| several goldfish and other marine animals swimming inside an aquarium | make the aquarium bubble-filled and psychedelic                        | psychedelic aquarium with several goldfish and other marine animals swimming inside |
| a man hiking in the mountains                                         | make the mountains out of paper cut-outs                               | paper cut-out mountains with a hiker                                                |
| a person rides on a horse while jumping over an obstacle              | person rides on a flying horse while jumping over an obstacle          | magical flying horse jumping over an obstacle                                       |
| men practicing martial on mats while others watch                     | turn the scene into a comic book                                       | martial arts comic on mats with onlookers                                           |
| the man is kiteboarding in the sea on his board                       | edit to make it look like he's riding a hoverboard                     | magical hoverboarder in the sea                                                     |
| a small dog that is running through some grass                        | make the grass appear to be made of bubble wrap                        | small dog running through bubble wrap grass                                         |
| two ducks are standing on the grass next to a river                   | turn the ducks into robots                                             | two robotic ducks standing on the grass next to a river                             |
| a motor bike rides on a roadway near a tree filled mountain           | morph the bike into a spaceship                                        | spaceship flying near a tree filled mountain.                                       |
| a person in full gear is paragliding on a mountain                    | transform into a hyper-realistic painting                              | hyper-realistic painting of a person paragliding on a mountain                      |
| the young man is skateboarding through the gate                       | transform the gate into a giant whale                                  | the young man skateboarding through the giant whale gate                            |
| a man riding a skateboard down a road                                 | cartoon-style animation of the same scene                              | cartoon-style animation of a man riding a skateboard down a road                    |
| a person on a snowboard going down a hill                             | make the snowboarder go up the mountain                                | snowboarder ascending a mountain in a winter wonderland.                            |
| an old soccer ball is on the grass near some trees                    | make the soccer ball appear to be made of glass and filled with liquid | shimmering glass soccer ball filled with liquid on the grass near some trees        |
| a person jumping a skateboard off of a ramp                           | make the ramp levitate in the air                                      | person jumping a skateboard off of a levitating ramp                                |
| a man playing tennis is preparing to hit the ball                     | make it look like he's playing a game of pong                          | man playing tennis with a digital pong ball                                         |

Table 3. We generate captions for evaluation using BLIP [2] and GPT-3 [1]. An initial caption (left column) is predicted by BLIP from the first frame of the video and then GPT-3 predicts edit prompts and matching captions for images containing the suggested edit. All videos used here are from the DAVIS dataset [4].
